# Supplementary material
Source: publisher site journal article supplement (http://www.degruyter.com/publication/journal_key/FCA/downloadAsset/FCA_Editorial_Policy.pdf)
Supplement: Supplementary file 1 [file FCA_Editorial_Policy.pdf]

# Fractional Calculus and Applied Analysis (FCAA)

## EDITORIAL POLICY

*Manuscripts should be submitted to FCAA electronically to the Editor-in-Chief Virginia Kiryakova by e-mail to [virginia@diogenes.bg](mailto:virginia@diogenes.bg) (or [fcaa@math.bas.bg](mailto:fcaa@math.bas.bg)), subject: FCAA, by a Corresponding Author with a reliable and unchanging email address.*

FCAA manuscripts must be submitted in LaTeX and in English.

Although at the initial stage of submitting a pdf-file is enough for consideration and reviewing, the authors should be ready to provide ASAP upon acceptance, finally revised versions of the LaTeX source and the figures' files (if any, in eps- and pdf-formats), together with the final pdf-file and the Transfer of Copyright Agreement (TCA form). The Instructions for Authors and FCAA format should be followed strictly, and it is expected almost camera-ready prepared manuscript.

- *Peer-reviewing:* At least two anonymous reviewers are appointed from the list of Editorial Board and invited external experts. The authors could suggest some possible reviewers among the close experts on the topic, but these could not be taken in mind by Editors.
- We are aiming to ensure the best possible *diversity* of publications' subjects, of authors' names and of their geographical distribution, and to promote *international collaboration*.
- To avoid some bad publishing practices, *please limit multiple co-authorship*. In case of more than 2-3 co-authors, they may be asked to describe and acknowledge their personal contributions to the paper. In case of technical help only, it can be acknowledged at the end of paper.
- Authors are kindly asked to *avoid frequent submissions* to FCAA, at least until a previous submission is still in procedure, or just recently published.
- Submissions will be considered *only if typeset in LaTeX format, with extreme care*, and allowing to generate internal and reference linking. The authors contribute in this process by making all the references complete, correct and properly structured.
- Submitting a manuscript to FCAA indicates by default a tacit understanding that *this paper is authors' original work, and is not published or under consideration in other journals*. In case of existing preliminary copy at arXiv.org, from the moment of acceptance of a paper, it should be referred to as in FCAA *only*.

- Once the paper is accepted, the corresponding author should fill in and sign the *TCA form* and send it by e-mail (scanned copy) or by fax to the Editor-in-Chief.
- The accepted papers, in their final proof-read version, are published since 2015 online at *De Gruyter's website*, sometimes in advance by *Ahead of Print* service. Once a manuscript appears online at the website, it is considered as published.
- All authors are responsible for the manuscript's contents and agree in advance to authorize a *corresponding author* to act on their behalf. He/she is responsible to inform the co-authors on the manuscript status, to check the proofreading and to share with the co-authors the received soft *Author's Copy*.
- After the online publication, the corresponding author is notified by e-mail and receives *Author's Copy* of the paper (pdf-file), for authors' noncommercial use only. Please do not expose in this form at public internet places. Instead, an author-created version of the article can be available, but journal's attributes must be indicated.
- The authors are obliged to refer to their papers with exact and full journal's name and attributes, as published in: "*Fract. Calc. Appl. Anal.*" Vol/ No/ Year/ pp., DOI: ..... , so to be correctly identified in the World databases.

## Resources

The following resources are to assist the authors in preparing manuscripts in a proper FCAA format, and reviewers. They can be found under "Supplementary Information" to the right:

- FCAA-Instructions for Authors
- Authors Kit (folder with all necessary auxiliary and sample files)
- Transfer of Copyright Agreement: FCAA-TCA-copyright.doc, FCAA-TCA-copyright.pdf
- Form for Reviewers: FCAA-Review-Form.doc, FCAA-Review-Form.pdf
